# Supplementary material for: Untargeted Safety Pharmacology Screen of Blood-Activating and Stasis-Removing Patent Chinese Herbal Medicines Identified Nonherbal Ingredients as a Cause of Organ Damage in Experimental Models
Source: Front Pharmacol. 2019 Sep 12;10:993. doi: 10.3389/fphar.2019.00993 (PMC6757273; doi:10.3389/fphar.2019.00993)
Supplement: Supplementary file 1 [file DataSheet_1.xlsx]

## Sheet: 英文58 组成
1.shensongyangxin capsule	panax ginseng,Radix Ophiopogonis,Corni fructus, saviae miltiorrhizae radix, parched semen ziziphi spinosae, Herba taxilli, radix paeoniae rubra, Eupolyphaga seu steleophaga, Gan Song, coptidis Rhizoma, fructus schisandrae sphenantherae, and OS draconis.
2.kangerxin capsule	Notoginseng radix, ginseng radix, radix ophiopogonis, saviae miltiorrhizae radix, fructus lycii, polygoni multiflori radix, and fructus crataegi
3.kangshuan capsule	Angelica tail, hirudo, Eupolyphaga seu steleophaga, saviae miltiorrhizae radix, zaocys ( prepared with wine ), Moschus, semen Strychni ( prepared ), Rhizoma drynariae ( prepared ), Bombyx batryticatus ( stir-fried with bran ), scolopendra, Rhizoma corydalis ( prepared with vinegar ), and bufonis Venenum ( prepared with wine )
4.naoluotong capsule	Salvia miltiorrhiza extract, tropinone hydrochloride, Ligusticum wallichii extract, methyl orange peel glucoside, astragalus root extract, vitamin b 6
5.linaoxin capsule	Saviae miltiorrhizae radix, Rhizoma ligustici chuanxiong, radix puerariae, lumbricus, radix paeoniae rubra, carthami Flos, radix curcumae, radix polygoni multiflori preparata, alismatis Rhizoma, fructus lycii, semen ziziphi spinosae ( parched ), cortex et radix Polygalae, Rhizoma Acori graminei, achyranthis radix, and glycyrrhrizae radix
6.qiliqiangxin capsule	Radix astragali, ginseng radix, radix aconiti lateralis preparata, saviae miltiorrhizae radix, semen lepidii, alismatis Rhizoma, Rhizoma polygonati odorati, ramulus cinnamomi, carthami Flos, cortex periplocae, and pericarpium citri tangerinae
7.tiandantongluo capsule	Rhizoma ligustici chuanxiong, siegesbeckia, saviae miltiorrhizae radix, hirudo, Rhizoma gastrodiae, Flos sophorae immaturus, Rhizoma Acori tatarinowii, artificial bezoar, radix astragali, achyranthis radix
8.tongxinluo capsule	Ginseng, leech, scorpion, sandalwood, ground beetle, centipede, cicada slough, Dalbergia wood, red peony root, spina date seed, frankincense and borneol
9.xinkening capsule	Saviae miltiorrhizae radix, notoginseng radix, borneolum syntheticum, cornu bubali concentrated powder, Venenum bufonis, carthami Flos, artificial calculus bovis, ginseng radix whisker
10.xinkeshu capsule	Hawthorn, salvia miltiorrhiza, kudzuvine root, pseudo-ginseng and costustoot
11.xinnaokang capsule	Radix astragali, radix panacis quinquefolii, notoginseng radix, corni fructus, hirudo, Eupolyphaga seu steleophaga, Arisaema cum bile, fructus piperis, lumbricus, and Agkistrodon
12.xuefuzhuyu capsule	Peach kernel, safflower, angelica, red peony root, dried rehmannia root, Ligusticum wallichii, bitter orange, platycodon grandiflorum, Bupleurum root, Achyranthes root and liquorice
13.Buchangnaoxintongcapsule	Radix astragali, radix paeoniae rubra, saviae miltiorrhizae radix, radix Angelicae sinensis, Rhizoma ligustici chuanxiong, semen persicae, carthami Flos, olibanum ( processed ), myrrha ( processed ), caulis spatholobi, achyranthis radix, ramulus cinnamomi, ramulus mori, lumbricus, Scorpio, hirudo
14.danqi tablet	Saviae miltiorrhizae radix and notoginseng radix
15.fufangdanshen tablet（beijing）	Saviae miltiorrhizae radix, notoginseng radix, borneolum syntheticum
16.fufangdanshen tablet（yunnan）	Saviae miltiorrhizae radix, notoginseng radix, borneolum syntheticum
17.guanmaining tablet	Saviae miltiorrhizae radix, myrrha ( parched ), caulis spatholobi, sanguis draxonis, Rhizoma corydalis ( processed with vinegar ), radix Angelicae sinensis, radix curcumae, radix polygoni multiflori preparata, semen persicae ( parched ), Rhizoma polygonati ( steamed ), carthami Flos, radix puerariae, olibanum ( parched ), borneolum syntheticum,
18.huoxuetongmai tablet	Caulis spatholobi, semen persicae, saviae miltiorrhizae radix, radix paeoniae rubra, carthami Flos, lignum dalbergiae odoriferae, radix curcumae, notoginseng radix, Rhizoma ligustici chuanxiong, pericarpium citri tangerinae, radix aucklandiae, Rhizoma Acori tatarinowii, fructus lycii, Rhizoma polygonati ( processed with wine ), ginseng radix, radix ophiopogonis, borneolum syntheticum,
19.jingzhiguanxin tablet	Saviae miltiorrhizae radix, radix paeoniae rubra, Rhizoma ligustici chuanxiong, carthami Flos, lignum dalbergiae odoriferae
20.naodesheng tablet	Notoginseng, Ligusticum wallichii, safflower, kudzuvine root, hawthorn ( enucleation )
21.naoxueshuan tablet	Safflower, angelica, leech ( processed ), red peony root, peach kernel, Ligusticum wallichii, salvia miltiorrhiza, Eupolyphaga seu steleophaga, antelope horn, bezoar
22.xiaoshuantongluo tablet	Rhizoma ligustici chuanxiong, saviae miltiorrhizae radix, astragali radix, alismatis Rhizoma, notoginseng radix, Flos sophorae immaturus, ramulus cinnamomi, radix curcumae, radix aucklandiae, borneolum syntheticum, and fructus crataegi
23.xinkeshu tablet	Hawthorn, salvia miltiorrhiza, kudzuvine root, pseudo-ginseng and costustoot
24.yangxinshi tablet	Radix astragali, ganoderma, radix codonopsis, saviae miltiorrhizae radix, radix puerariae, rehmanniae radix, radix Angelicae sinensis, Herba epimedii, Rhizoma corydalis ( preparata ), fructus crataegi, and radix glycyrrhizae preparata,etc
25.zhijiangning tablet	Hawthorn, prepared fleece - flower root, red sage root, kudzuvine root, snakegourd fruit, cassia seed, aluminum chloropeite and vitamin c
26.Guanmaitong tablet	Medlar, fleece - flower root, epimedium, safflower, grassleaved sweetflag, salvia miltiorrhiza, loranthus parasiticus and borneol
27.Fufangdanshend pill	Saviae miltiorrhizae radix, notoginseng radix and borneolum syntheticum
28.qishenyiqidi pill	Radix astragali, saviae miltiorrhizae radix, notoginseng radix, and oleum sesami
29.Huatuozaizao pill	Ligusticum wallichii, Evodia rutaecarpa, borneol .etc
30.huoxin pill	Ginseng, ganoderma lucidum, musk, bezoar, bear bile, pearl, monkshood, safflower, toad venom and borneol
31.renshenzaizao pill	Ginseng, Agkistrodon ( processed with wine ), Pogostemon cablin, sandalwood, clove, figwort, asarum, nutgrass galingale rhizome ( processed with vinegar ), earthworm, prepared rehmannia root, notoginseng, frankincense ( processed with vinegar ), green husk, cardamom, ledebouriella root, prepared fleece - flower root, Ligusticum wallichii, turmeric, astragalus membranaceus, liquorice, coptis root,…
32.xiaoshuanzaizao pill	Sanguis draxonis, radix paeoniae rubra, myrrha ( processed with vinegar ), radix Angelicae sinensis, achyranthis radix, saviae miltiorrhizae radix, Rhizoma ligustici chuanxiong, ramulus cinnamomi, notoginseng radix, fructus amomi rotundus, radix curcumae, fructus aurantii ( parched with bran ), atractylodis Rhizoma ( parched with bran ), ginseng radix, lignum aquilariae resinatum, Agkistrodon, Bo…
33.xuefuzhuyu pill	Bupleuri radix, radix Angelicae sinensis, rehmanniae radix, radix paeoniae rubra, carthami Flos, semen persicae, fructus aurantii ( stir-fried with bran ), glycyrrhrizae radix, Rhizoma ligustici chuanxiong, achyranthis radix, and radix platycodi
34.lemai granules	Saviae miltiorrhizae radix, Rhizoma ligustici chuanxiong, radix paeoniae rubra, carthami Flos, Rhizoma Cyperi, radix aucklandiae, and fructus crataegi
35.tongmai granules	Saviae miltiorrhizae radix, Rhizoma ligustici chuanxiong, radix puerariae
36.xuefuzhuyu granules	Peach kernel, safflower, angelica, Ligusticum wallichii, dried rehmannia root, red peony root, Achyranthes root, Bupleurum root, bitter orange, platycodon grandiflorum and liquorice
37.wenxin granules	Codonopsis pilosula, Siberian solomonseal rhizome, notoginseng, amber, Gan Song
38.tongmaiyangxin pill	Rehmanniae radix, caulis spatholobi, radix ophiopogonis, glycyrrhrizae radix, radix polygoni multiflori preparata, colla corii asini, fructus schisandrae chinensis, party 60g, carapax et plastrum testudinis ( vinegar ), fructus jujubae, and ramulus cinnamomi
39.dengzhanshengmai capsule	Erigeron breviscapus, ginseng, Schisandra chinensis, Ophiopogon japonicus
40.xinbao pill	Flos daturae metelis, ginseng radix, cortex cinnamomi, radix aconiti lateralis preparata, cornu Cervi Pantotrichum, borneolum syntheticum, artificial Moschus, notoginseng radix, and Venenum bufonis
41.zhuyutongmai capsule	Leech, peach kernel, tabanus, rhubarb
42.hedan tablet	Lotus leaf, salvia miltiorrhiza, hawthorn, senna leaf, psoralea corylifolia ( stir-fried with salt )
43.tongmaijiangzhi tablet	Graptopetalum, Ligusticum wallichii, lotus leaf, notoginseng, pricklyash peel
44.xuefuzhuyu tablet	Bupleuri radix, radix Angelicae sinensis, rehmanniae radix, radix paeoniae rubra, carthami Flos, semen persicae ( parched ), fructus aurantii ( parched with bran ), glycyrrhrizae radix, Rhizoma ligustici chuanxiong, achyranthis radix, and radix platycodi
45.naoan capsule	Rhizoma ligustici chuanxiong, radix Angelicae sinensis, ginseng radix, carthami Flos, borneolum syntheticum
46.yixin pill	Ginseng radix rubri, cornu bovis seu bubali powder, Venenum bufonis, borneolum syntheticum, carthami Flos, artificial calculus bovis, radix aconiti lateralis preparata ( processed ), artificial Moschus, notoginseng radix, benzoin, and margarita
47.xueshuanxinmaining capsule	Ligusticum wallichii, Sophora japonica, salvia miltiorrhiza, leech, Ilex pubescens, artificial bezoar, artificial musk, ginseng stem and leaf total saponin, borneol and toad venom
48.zhengxintai capsule	Radix astragali, radix puerariae, radix salviae miltiorrhizae, mistletoe, hawthorn, Ligusticum wallichii
49.Danxiongtongmai granules	Saviae miltiorrhizae radix, Rhizoma ligustici chuanxiong, Rhizoma corydalis, fructus lycii, radix polygoni multiflori preparata,etc
50.Fufangxueshuantong capsule	Panax notoginseng, astragalus, salvia miltiorrhiza, Scrophularia root
51.Danhong injection	Salvia miltiorrhiza ,flos carthami
52.Xiangdan injection	Salvia miltiorrhiza ,Lignum Dalbergiae Odoriferae,
53.Shuxuetong injection	Leech,Earthworm
54.Xingnaojing injection	Natural musk, borneol, cape jasmine and turmeric. Accessories: polysorbate 80, sodium chloride for injection
55.Mailuoning injection	Honeysuckle, Achyranthes root, Dendrobium and figwort
56.Xuebijing injection	Safflower, red peony root, Ligusticum wallichii, salvia miltiorrhiza, angelica
57.Shenmai injection	Ginseng radix rubri and radix ophiopogonis. Accessories are polysorbate 80
58.Shenfu injection	Ginseng radix rubri Aconitum root
